# Supplementary figures and images for: Pharmacodynamics of Doripenem Alone and in Combination with Relebactam in an In Vitro Hollow-Fiber Dynamic Model: Emergence of Resistance of Carbapenemase-Producing Klebsiella pneumoniae and the Inoculum Effect
Source: MDPI journal article supplement (doi:10.3390/antibiotics12121705), 2023-12-07

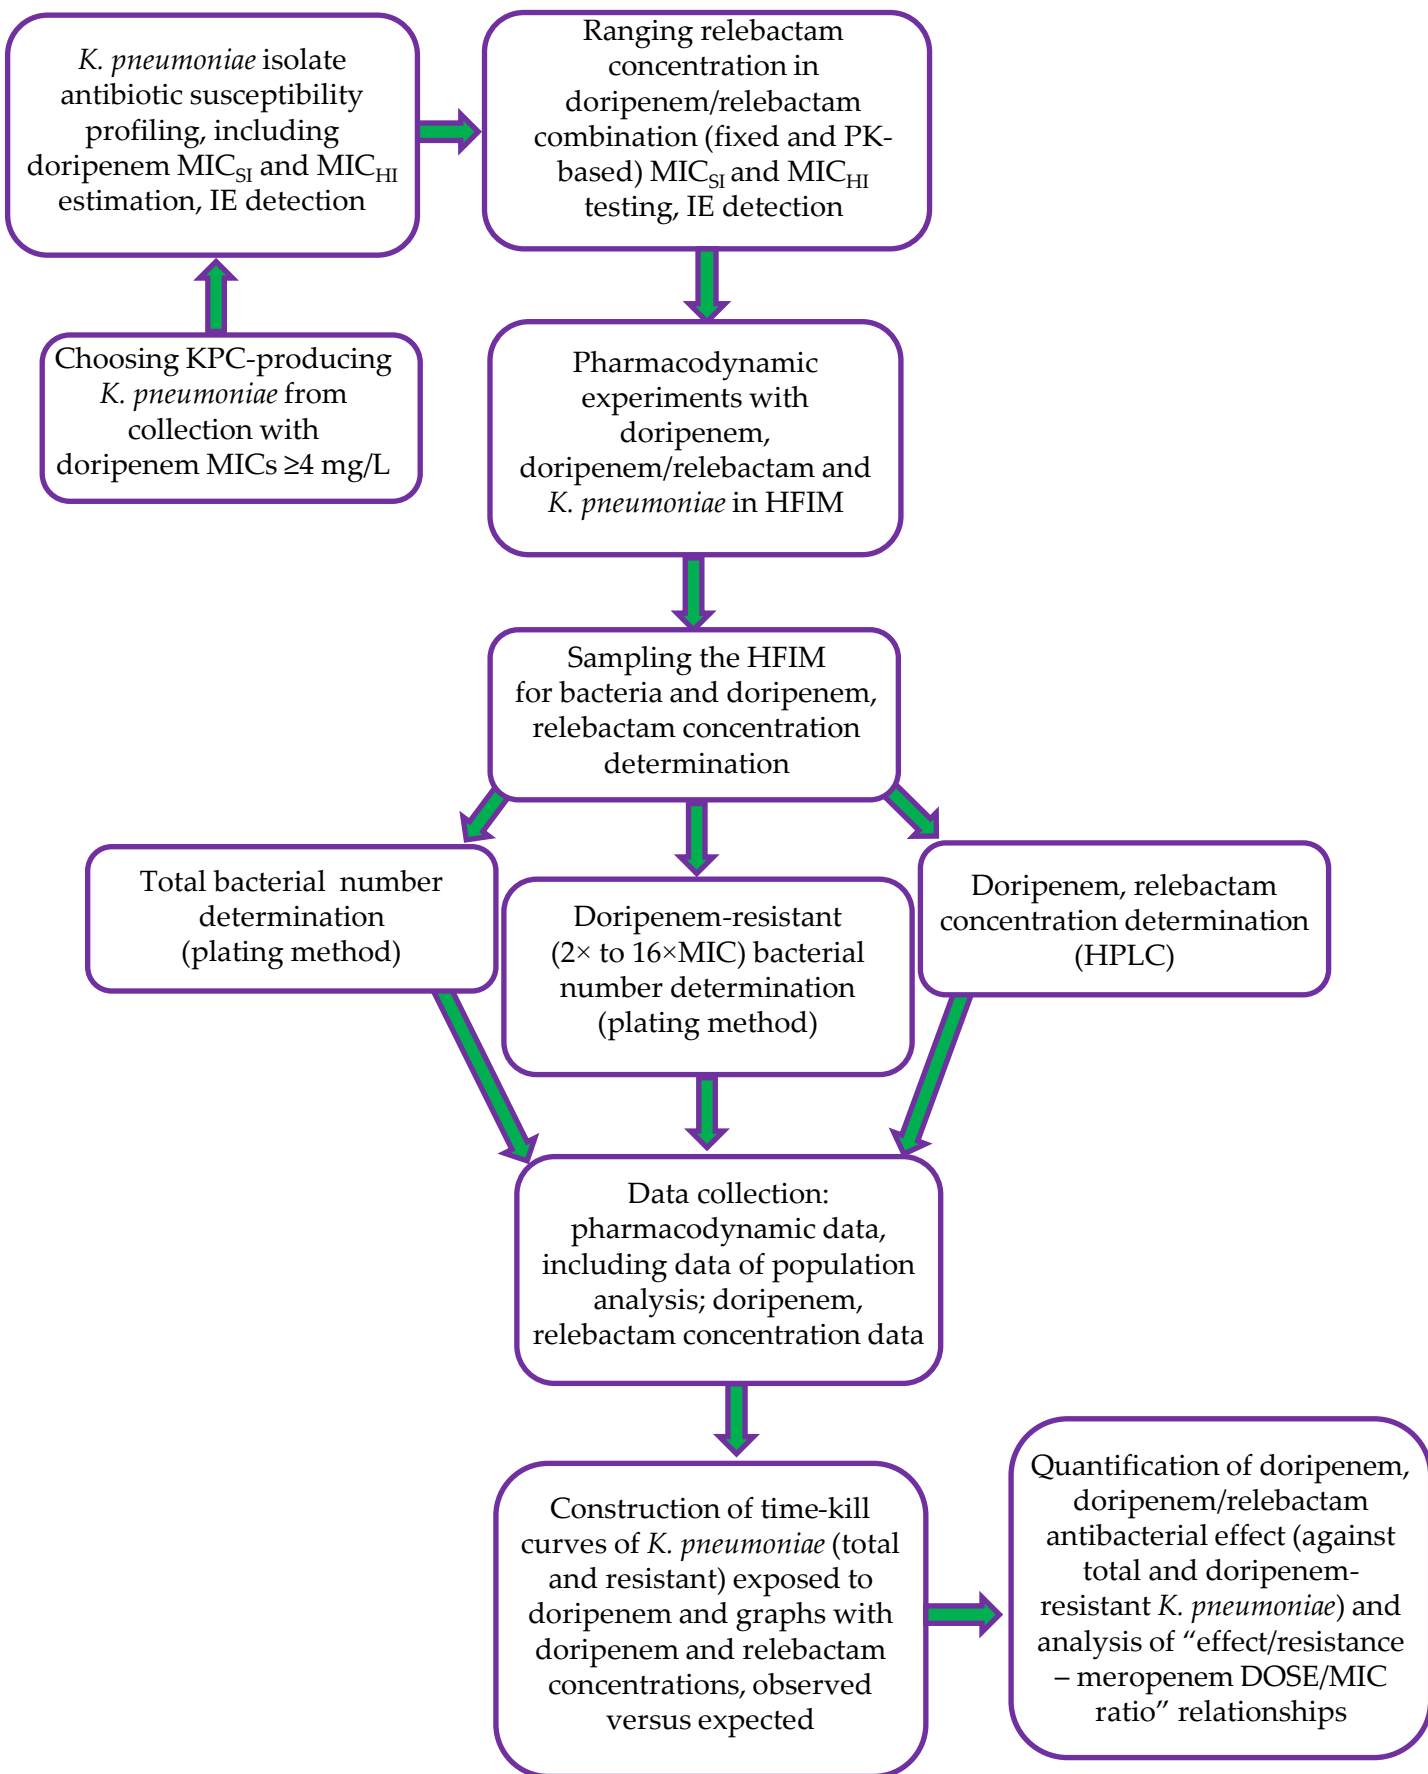

**Figure S1.** The flowchart of the materials and methods section.

Supplement: s1 [file s1]
